# Supplementary material for: Oncogenic potential of truncated RXRα during colitis-associated colorectal tumorigenesis by promoting IL-6-STAT3 signaling
Source: PubMed Central journal article supplement (PMC6443775; doi:10.1038/s41467-019-09375-8), 2019-04-01

# Supplementary Data 1

Ye et al.

Raw data for immunoblotting

Fig. 2a

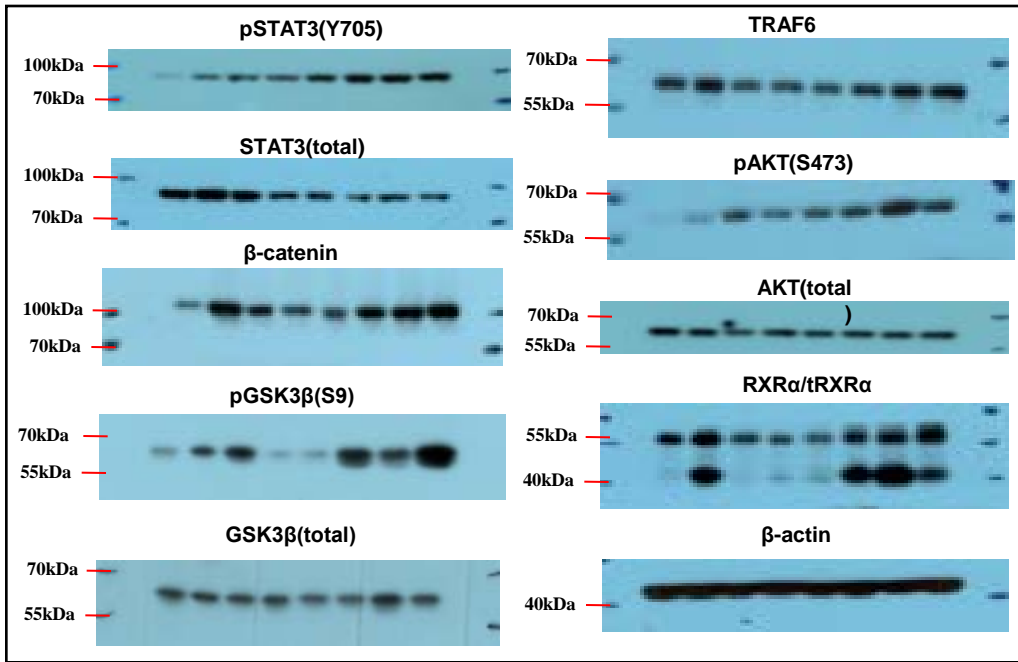

Fig. 2b

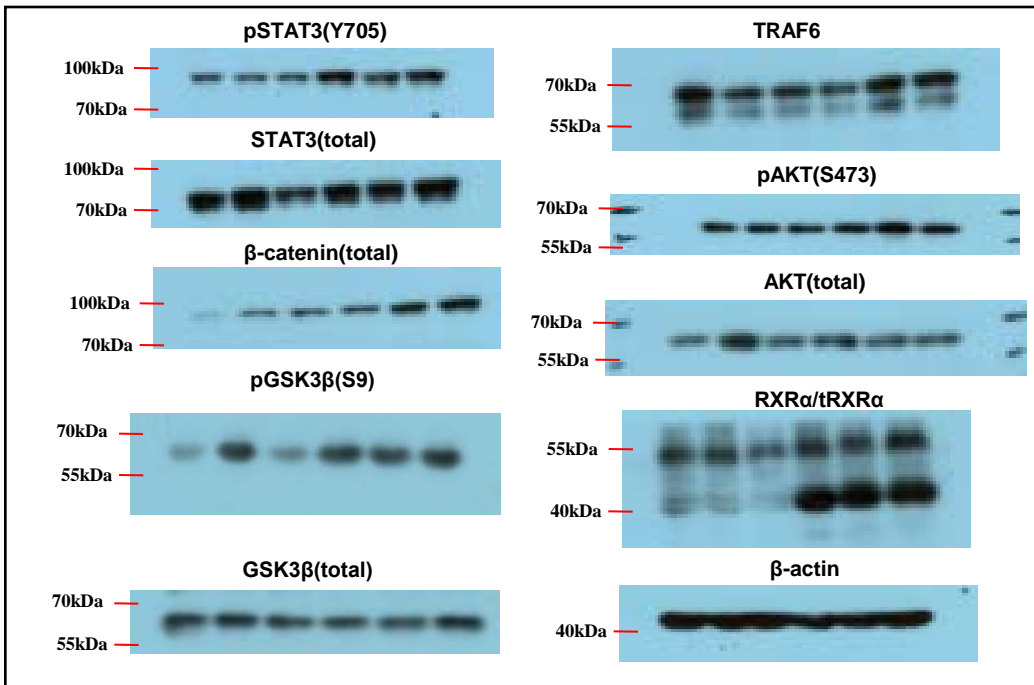

Fig. 2f

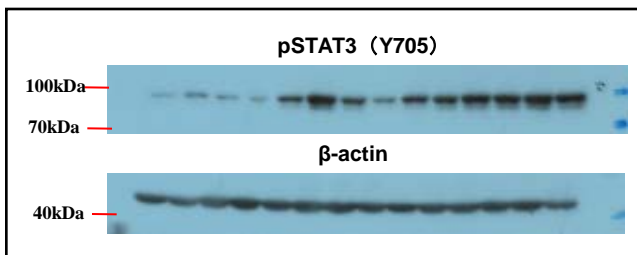

**Fig. 4f**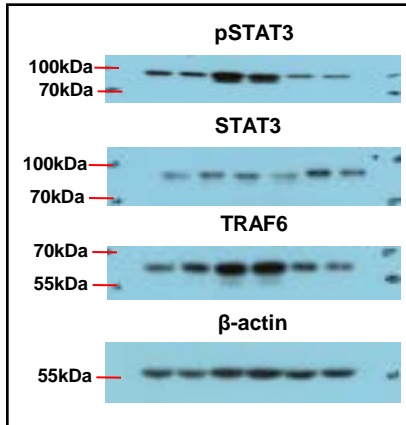**Fig. 5c**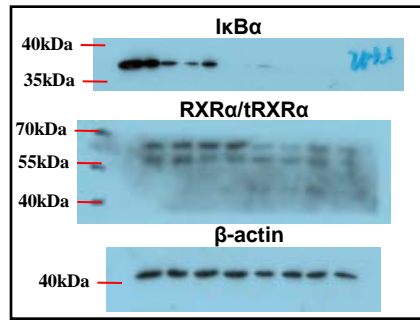**Fig. 5f**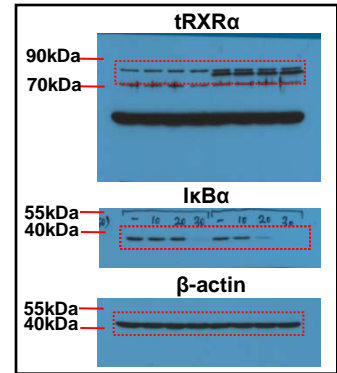**Fig. 5h**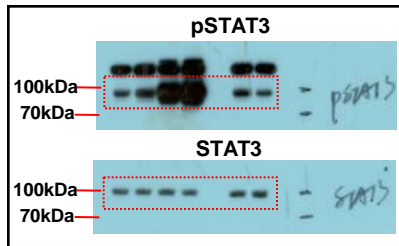**Fig. 6a**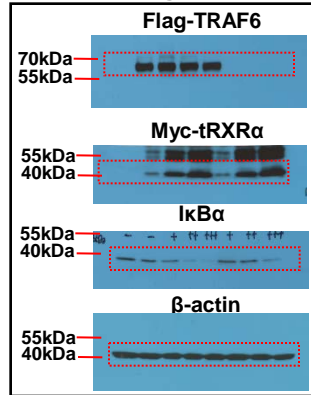**Fig. 6e**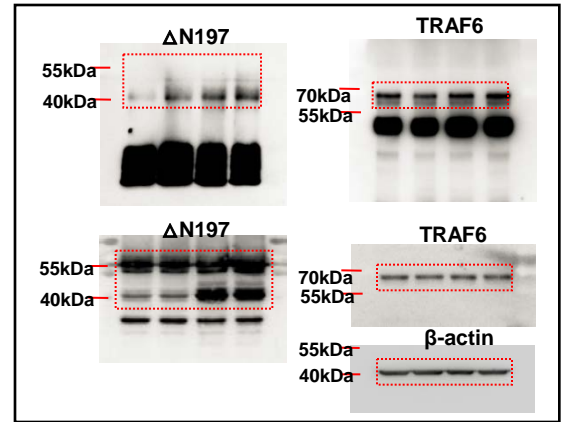**Fig. 6f**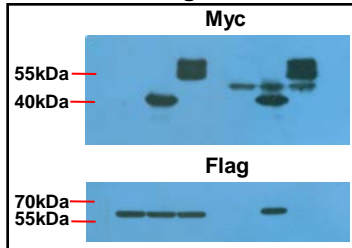**Fig. 6h**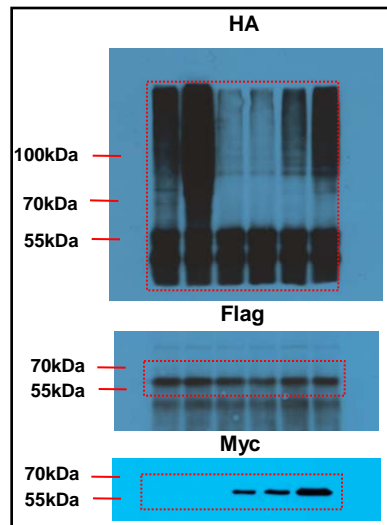**Fig. 6i**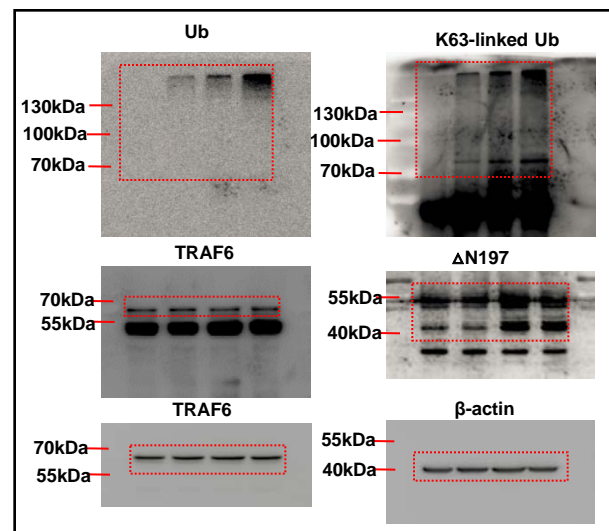

Fig. 7a

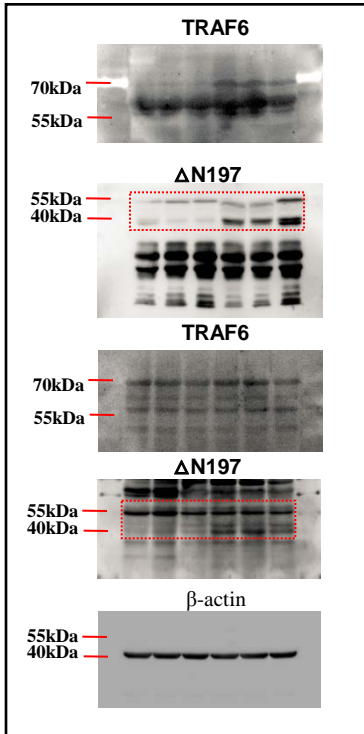

Fig. 7b

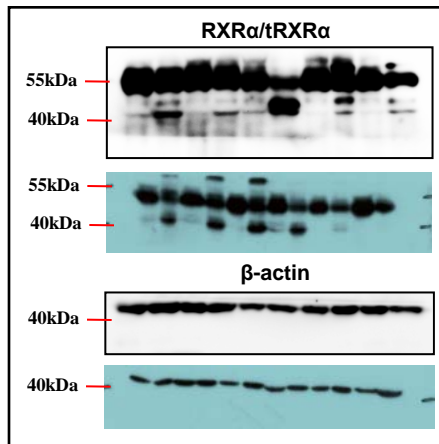

Fig. 7g

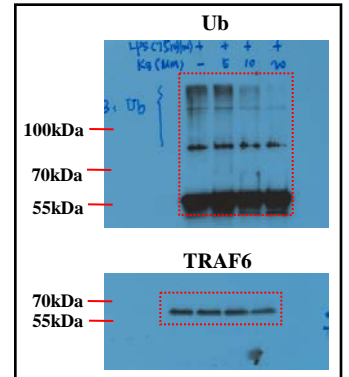

Fig. S1c

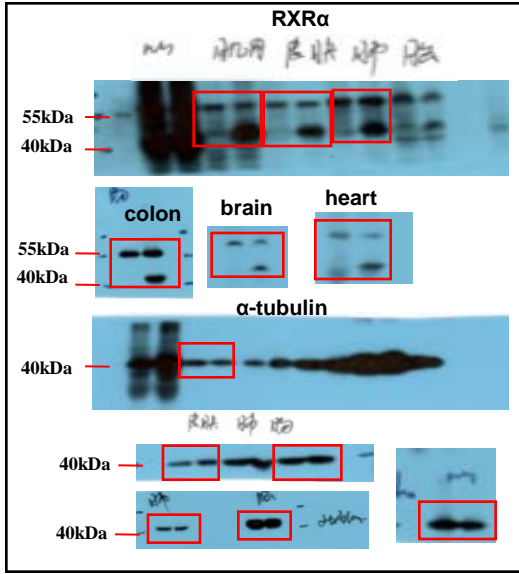

Fig. S4c

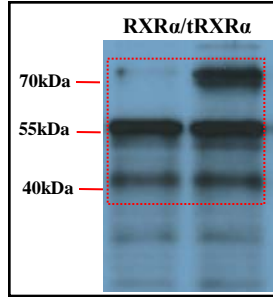

Fig. S4d

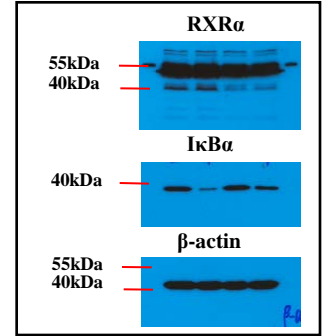

Fig. S5a

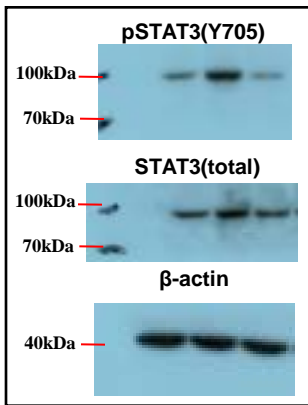

Fig. S5c

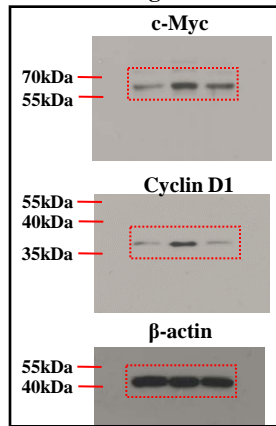

Fig. S6a/RAW264.7

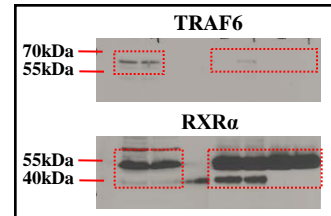

Fig. S6a/THP1

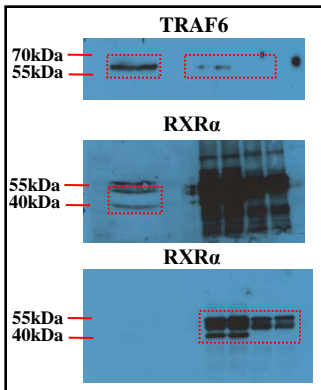

Fig. S6c

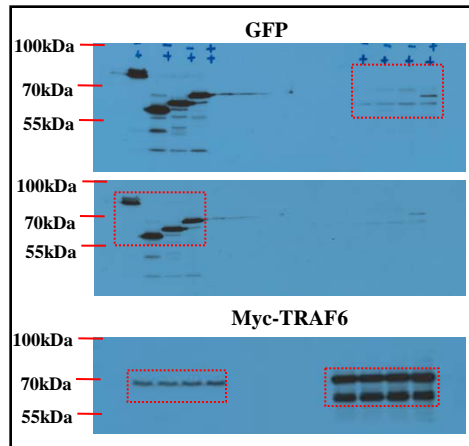

Fig. S6d

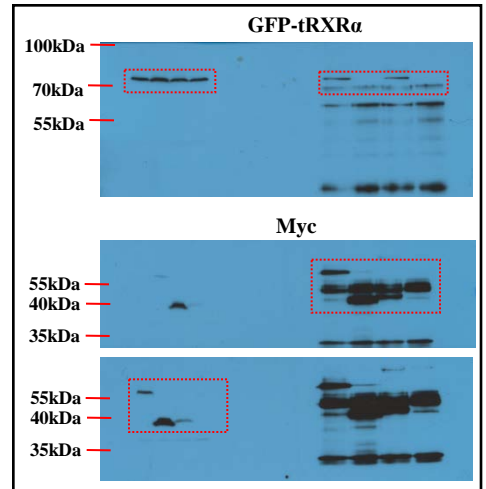

Fig. S6e

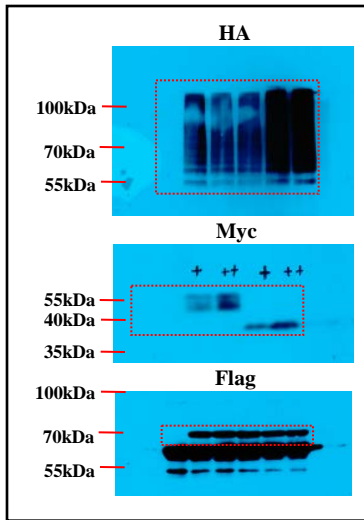

Fig. S6f

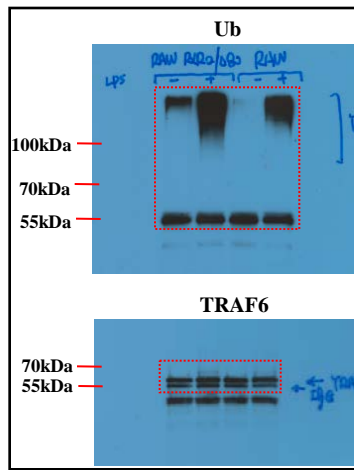

Fig. S7e

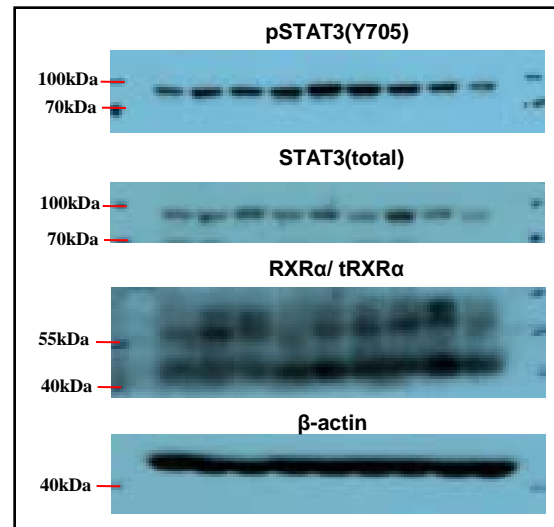

Fig. S7g

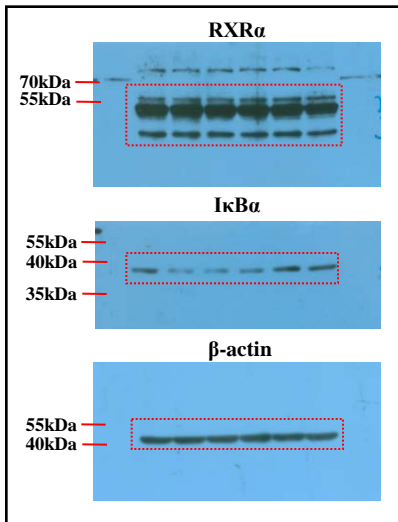

Fig. S7j

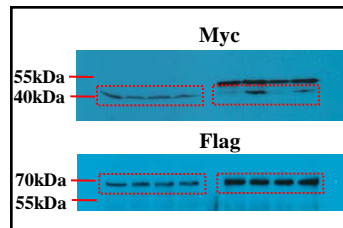

Supplement: 41467_2019_9375_MOESM3_ESM.pdf [file 41467_2019_9375_MOESM3_ESM.pdf]
