# Supplementary material for: Oncogenic potential of truncated RXRα during colitis-associated colorectal tumorigenesis by promoting IL-6-STAT3 signaling
Source: PubMed Central journal article supplement (PMC6443775; doi:10.1038/s41467-019-09375-8), 2019-04-01
Supplement: 41467_2019_9375_MOESM2_ESM.pdf [file 41467_2019_9375_MOESM2_ESM.pdf]

## **Description of Additional Supplementary Files**

File Name: Supplementary Data 1

Description: Raw data for immunoblotting.
