# Supplementary material for: Oncogenic potential of truncated RXRα during colitis-associated colorectal tumorigenesis by promoting IL-6-STAT3 signaling
Source: PubMed Central journal article supplement (PMC6443775; doi:10.1038/s41467-019-09375-8), 2019-04-01
Supplement: 41467_2019_9375_MOESM4_ESM.pdf [file 41467_2019_9375_MOESM4_ESM.pdf]

## Reporting Summary

Nature Research wishes to improve the reproducibility of the work that we publish. This form provides structure for consistency and transparency in reporting. For further information on Nature Research policies, see [Authors & Referees](#) and the [Editorial Policy Checklist](#).

### Statistics

For all statistical analyses, confirm that the following items are present in the figure legend, table legend, main text, or Methods section.

n/a Confirmed

- The exact sample size ( $n$ ) for each experimental group/condition, given as a discrete number and unit of measurement
- A statement on whether measurements were taken from distinct samples or whether the same sample was measured repeatedly
- The statistical test(s) used AND whether they are one- or two-sided  
*Only common tests should be described solely by name; describe more complex techniques in the Methods section.*
- A description of all covariates tested
- A description of any assumptions or corrections, such as tests of normality and adjustment for multiple comparisons
- A full description of the statistical parameters including central tendency (e.g. means) or other basic estimates (e.g. regression coefficient) AND variation (e.g. standard deviation) or associated estimates of uncertainty (e.g. confidence intervals)
- For null hypothesis testing, the test statistic (e.g.  $F$ ,  $t$ ,  $r$ ) with confidence intervals, effect sizes, degrees of freedom and  $P$  value noted  
*Give  $P$  values as exact values whenever suitable.*
- For Bayesian analysis, information on the choice of priors and Markov chain Monte Carlo settings
- For hierarchical and complex designs, identification of the appropriate level for tests and full reporting of outcomes
- Estimates of effect sizes (e.g. Cohen's  $d$ , Pearson's  $r$ ), indicating how they were calculated

*Our web collection on [statistics for biologists](#) contains articles on many of the points above.*

### Software and code

Policy information about [availability of computer code](#)

Data collection

N/A

Data analysis

Graphs and charts data analyzed using GraphPad Prism.

For manuscripts utilizing custom algorithms or software that are central to the research but not yet described in published literature, software must be made available to editors/reviewers. We strongly encourage code deposition in a community repository (e.g. GitHub). See the Nature Research [guidelines for submitting code & software](#) for further information.

### Data

Policy information about [availability of data](#)

All manuscripts must include a [data availability statement](#). This statement should provide the following information, where applicable:

- Accession codes, unique identifiers, or web links for publicly available datasets
- A list of figures that have associated raw data
- A description of any restrictions on data availability

*Provide your data availability statement here.*

### Field-specific reporting

Please select the one below that is the best fit for your research. If you are not sure, read the appropriate sections before making your selection.

- Life sciences       Behavioural & social sciences       Ecological, evolutionary & environmental sciences

For a reference copy of the document with all sections, see [nature.com/documents/nr-reporting-summary-flat.pdf](https://www.nature.com/documents/nr-reporting-summary-flat.pdf)

## Life sciences study design

All studies must disclose on these points even when the disclosure is negative.

|                 |                                                                                                                                             |
|-----------------|---------------------------------------------------------------------------------------------------------------------------------------------|
| Sample size     | Sample size was determined to be adequate based on the magnitude and consistency of measurable differences between groups.                  |
| Data exclusions | On principle, data were only excluded for failed experiments, reasons for which included suboptimal activation and microbial contamination. |
| Replication     | Replicate experiments were successful.                                                                                                      |
| Randomization   | No randomization of mice. Mice analyzed were litter mates and sex-matched whenever possible.                                                |
| Blinding        | Investigators were not blinded to mouse genotypes during experiments. Data reported for mouse experiments are not subjective.               |

## Reporting for specific materials, systems and methods

We require information from authors about some types of materials, experimental systems and methods used in many studies. Here, indicate whether each material, system or method listed is relevant to your study. If you are not sure if a list item applies to your research, read the appropriate section before selecting a response.

### Materials & experimental systems

| n/a                                 | Involvement in the study                                        |
|-------------------------------------|-----------------------------------------------------------------|
| <input type="checkbox"/>            | <input checked="" type="checkbox"/> Antibodies                  |
| <input type="checkbox"/>            | <input checked="" type="checkbox"/> Eukaryotic cell lines       |
| <input checked="" type="checkbox"/> | <input type="checkbox"/> Palaeontology                          |
| <input type="checkbox"/>            | <input checked="" type="checkbox"/> Animals and other organisms |
| <input checked="" type="checkbox"/> | <input type="checkbox"/> Human research participants            |
| <input checked="" type="checkbox"/> | <input type="checkbox"/> Clinical data                          |

### Methods

| n/a                                 | Involvement in the study                        |
|-------------------------------------|-------------------------------------------------|
| <input checked="" type="checkbox"/> | <input type="checkbox"/> ChIP-seq               |
| <input checked="" type="checkbox"/> | <input type="checkbox"/> Flow cytometry         |
| <input checked="" type="checkbox"/> | <input type="checkbox"/> MRI-based neuroimaging |

## Antibodies

|                 |                                                                                                                                                                                                                                                                                                                                                                                                                                                                                                                                                                                                                                                                                                                                                                                                                                                                                                                                                                                                                                               |
|-----------------|-----------------------------------------------------------------------------------------------------------------------------------------------------------------------------------------------------------------------------------------------------------------------------------------------------------------------------------------------------------------------------------------------------------------------------------------------------------------------------------------------------------------------------------------------------------------------------------------------------------------------------------------------------------------------------------------------------------------------------------------------------------------------------------------------------------------------------------------------------------------------------------------------------------------------------------------------------------------------------------------------------------------------------------------------|
| Antibodies used | Anti-RXR $\alpha$ (D20) (Cat. sc-553), anti-RXR $\alpha$ ( $\Delta$ N197) (Cat. sc-774), Anti-Myc (9E10) (Cat. Sc-40), anti-TRAF6(D-10) (Cat. sc-8409), anti-TRAF6(H-274) (Cat. sc-7221), anti-AKT (Cat. sc-8312), anti- $\beta$ -catenin(E-5) (Cat. sc-7963), anti-PCNA (FC-261) (Cat. sc-7907) and anti-p65 (Cat. sc-109) antibodies were from Santa Cruz Biotechnology (Santa Cruz, CA, USA). Anti-I $\kappa$ B $\alpha$ (Cat. ab32518), anti-pSTAT3 (Y705) (Cat. ab76315), Anti-Ki-67 (Cat.ab15580) and anti-CD68 (Cat. ab31630) antibodies were from Abcam (UK). Anti-Ubiquitin (Cat. 3933S), anti-STAT3 (Cat. 9139S), anti-p-I $\kappa$ B $\alpha$ (Cat. 9246), anti-K63-ubiquitin (D7A11)(Cat.#5621), Anti-pGSK3 $\beta$ (Ser9)(Cat.#9336), and anti-pAKT(S473) (Cat. 9271S) antibodies were from Cell Signal Technology (Beverly, MA, USA). Anti-GSK3 $\beta$ (total)(Cat.610202) from BD biosciences (San Diego, USA). Anti- $\beta$ -actin (Cat. A5441) and anti-FLAG (Cat. F1804) antibodies were from sigma (St. Louis, MO, USA). |
| Validation      | More information in Methods section.                                                                                                                                                                                                                                                                                                                                                                                                                                                                                                                                                                                                                                                                                                                                                                                                                                                                                                                                                                                                          |

## Eukaryotic cell lines

Policy information about [cell lines](#)

|                                                                   |                                                                                                                                                                                                                     |
|-------------------------------------------------------------------|---------------------------------------------------------------------------------------------------------------------------------------------------------------------------------------------------------------------|
| Cell line source(s)                                               | RAW264.7, CV-1 cells, THP-1 and HEK293T were purchased from the American Type Culture Collection (Manassas, VA, USA). CT26.WT and HCT-116 were purchased from Cell Bank in Chinese Academy of Sciences in Shanghai. |
| Authentication                                                    | None of the cell lines used were authenticated.                                                                                                                                                                     |
| Mycoplasma contamination                                          | Cell lines were tested negative for mycoplasma.                                                                                                                                                                     |
| Commonly misidentified lines (See <a href="#">ICLAC</a> register) | No cell lines used are listed in the database of commonly misidentified cell lines.                                                                                                                                 |

## Animals and other organisms

Policy information about [studies involving animals](#); [ARRIVE guidelines](#) recommended for reporting animal research

|                    |                                                                                                            |
|--------------------|------------------------------------------------------------------------------------------------------------|
| Laboratory animals | Description of research mice used for experiments can be found in the relevant figure legends and Methods. |
| Wild animals       | N/A                                                                                                        |

Field-collected samples

All of the mice were maintained with 12 h light/12 h dark cycles at the Laboratory Animal Center in Xiamen University.

Ethics oversight

All of the mice were complied with the Animal Care and Use Committee of Xiamen University

Note that full information on the approval of the study protocol must also be provided in the manuscript.
